# Supplementary material for: Transfer Hydrogenation of Vinyl Arenes and Aryl Acetylenes with Ammonia Borane Catalyzed by Schiff Base Cobalt(II) Complexes
Source: MDPI journal article supplement (doi:10.3390/ijms25084363), 2024-04-15
Supplement: s1 [file s1]

# Supplementary Materials

for

## Transfer Hydrogenation of Vinyl Arenes and Aryl Acetylenes with Ammonia Borane Catalyzed by Schiff Base Cobalt(II) Complexes

Maciej Skrodzki <sup>1,2</sup>, Maciej Zaranek <sup>2</sup>, Giuseppe Consiglio <sup>3,\*</sup> and Piotr Pawluć <sup>1,2,\*</sup>

<sup>1</sup> Faculty of Chemistry, Adam Mickiewicz University, Uniwersytetu Poznańskiego 8, 61-614 Poznań, Poland; maciej.skrodzki@amu.edu.pl

<sup>2</sup> Centre for Advanced Technologies, Adam Mickiewicz University, Uniwersytetu Poznańskiego 10, 61-614 Poznań, Poland; m.zaranek@amu.edu.pl

<sup>3</sup> Department of Chemical Science, University of Catania, Via S. Sofia 64, 95125 Catania, Italy

\* Correspondence: giuseppe.consiglio@unict.it (G.C.); piotrpaw@amu.edu.pl (P.P.)

### GCMS analyses of selected products

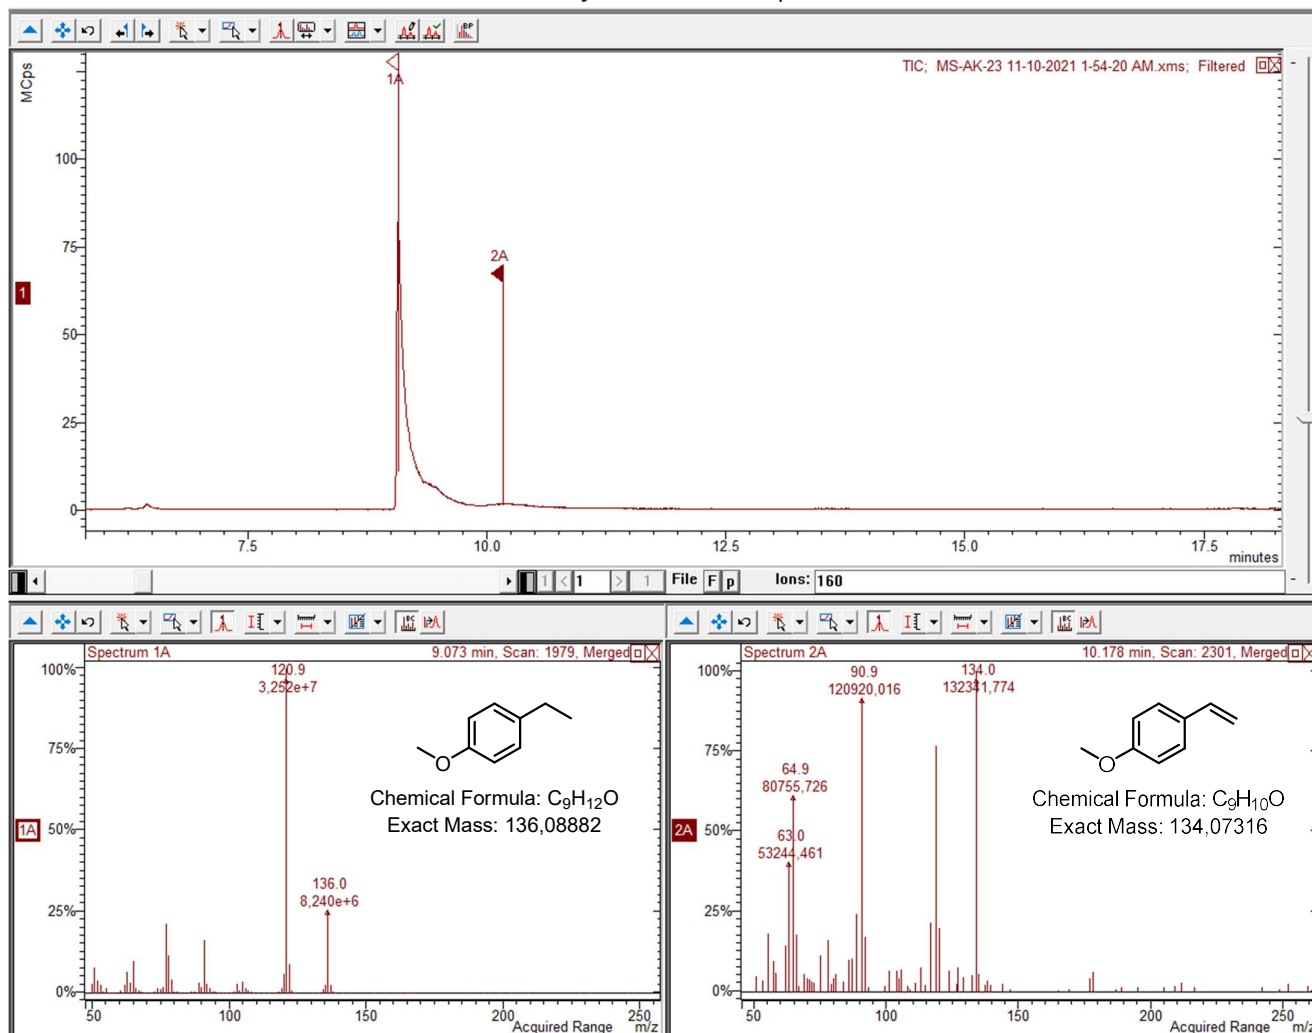

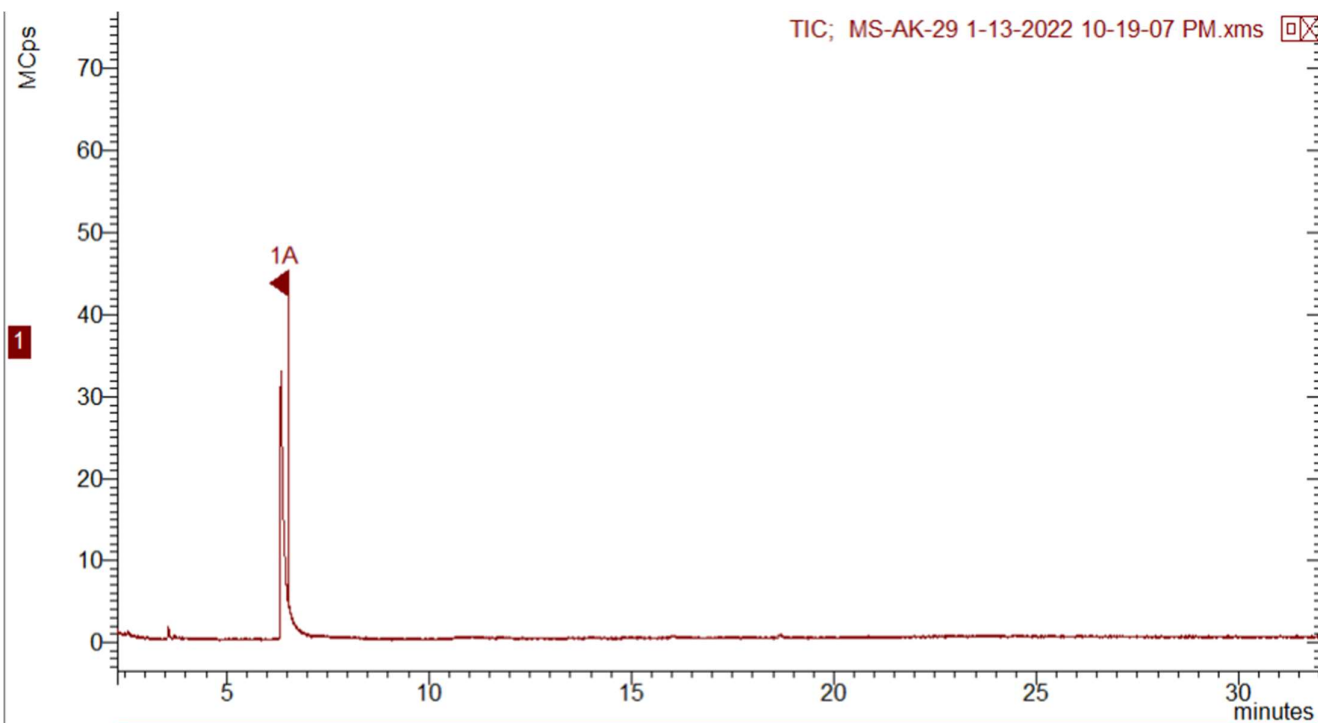

Scans

791

2256

3712

5162

6594

8017

Segment 1

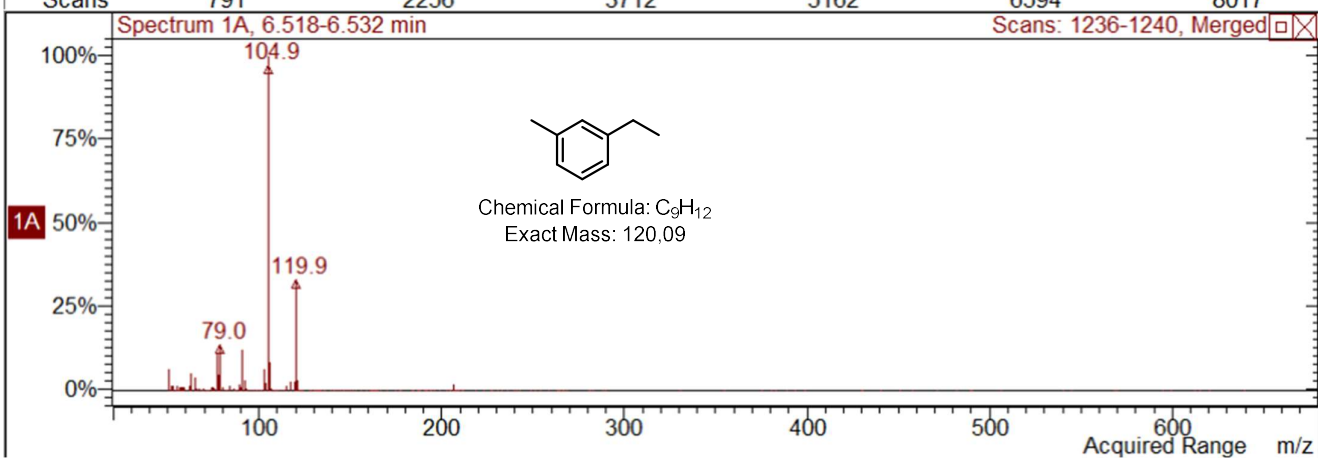

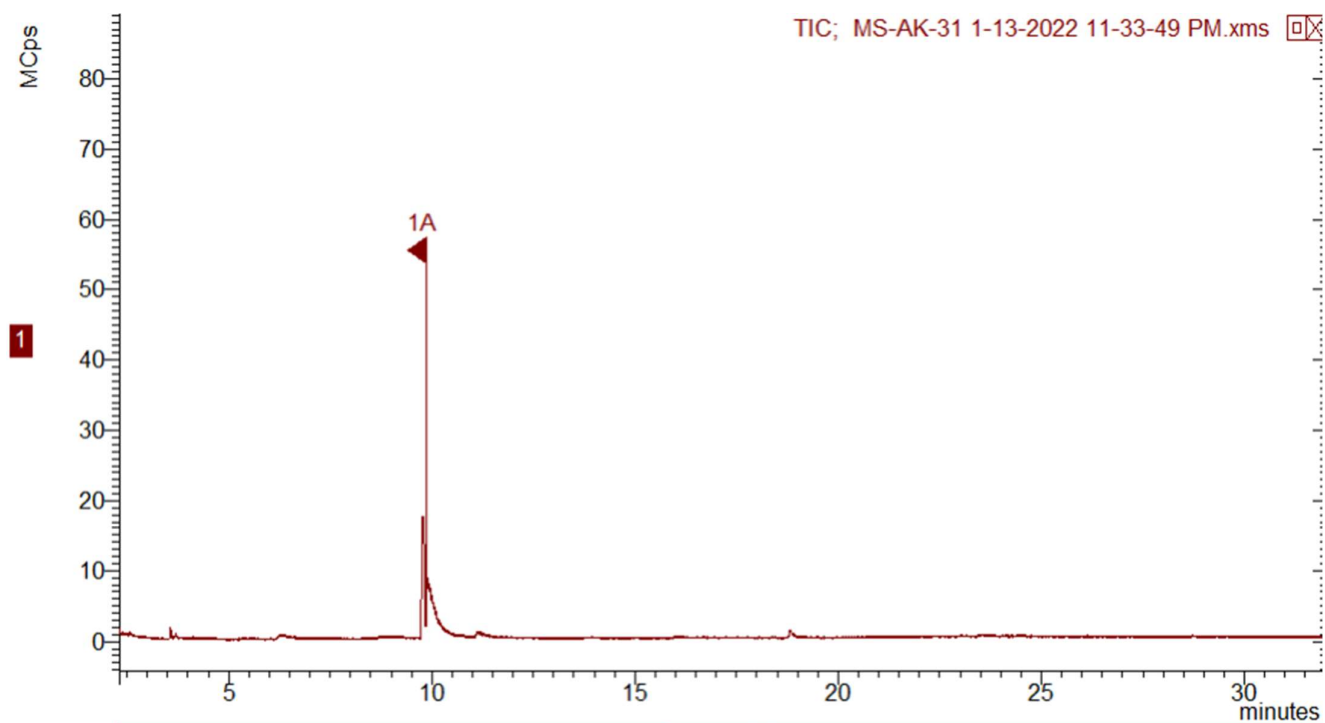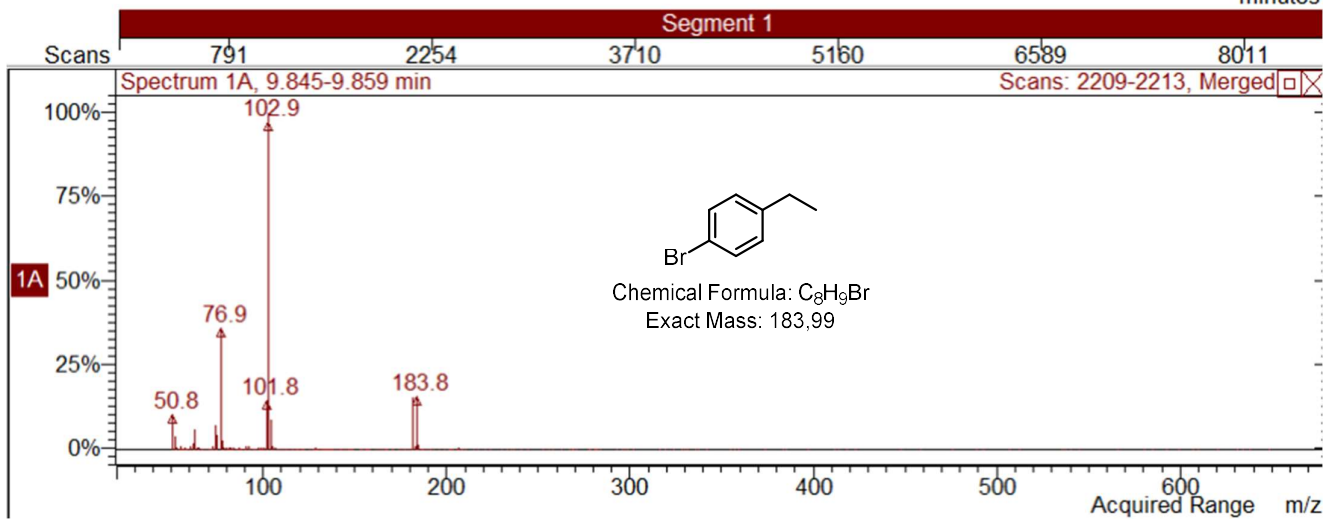

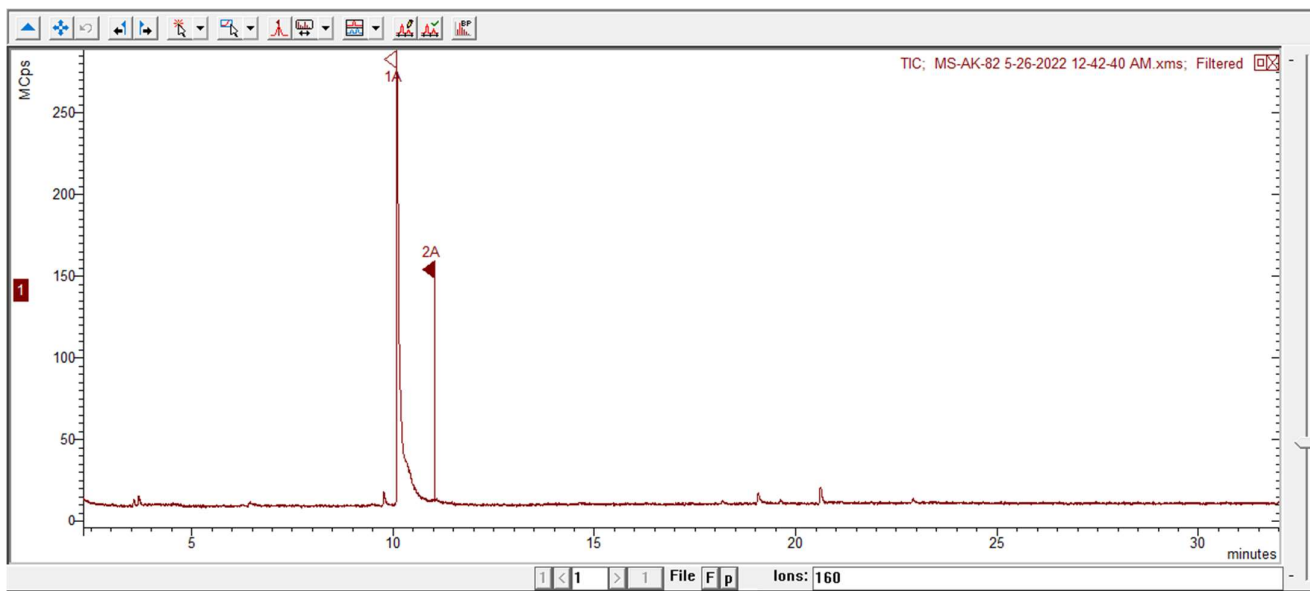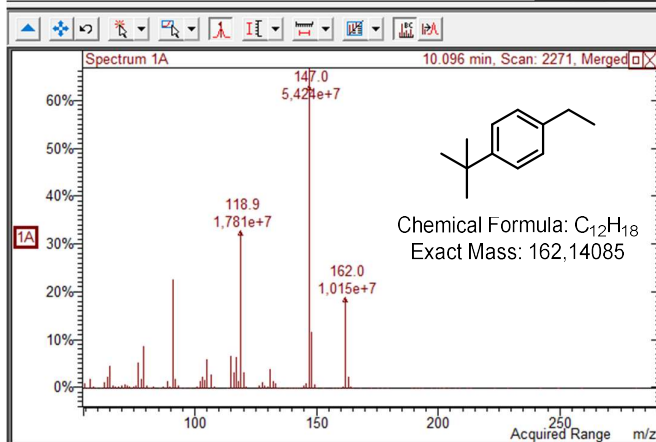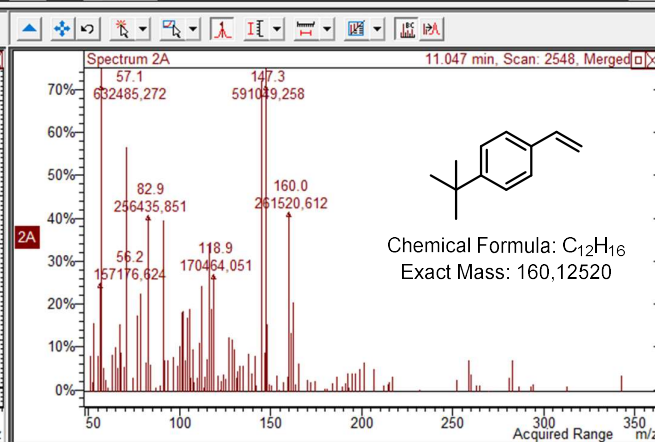

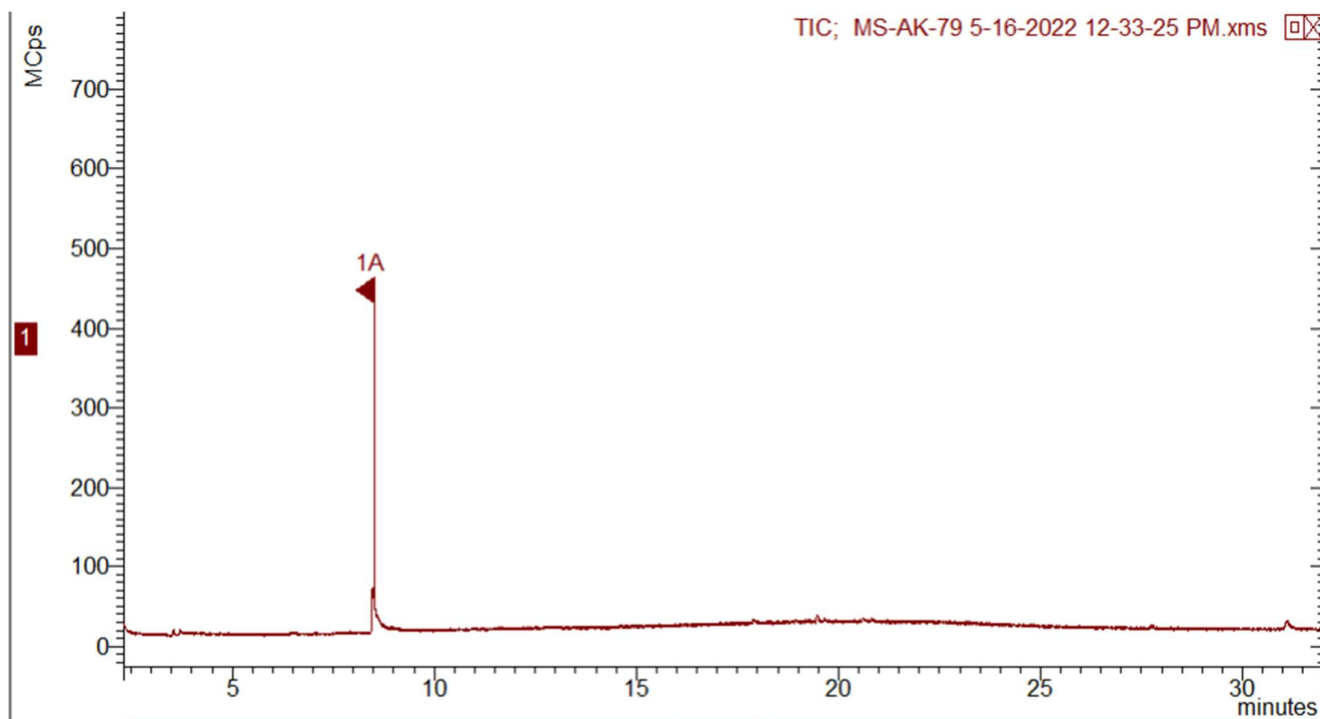

Scans 787 2242 3698 5137 6568 7981

Segment 1

Spectrum 1A, 8.522-8.536 min Scans: 1812-1816, Merged ☐

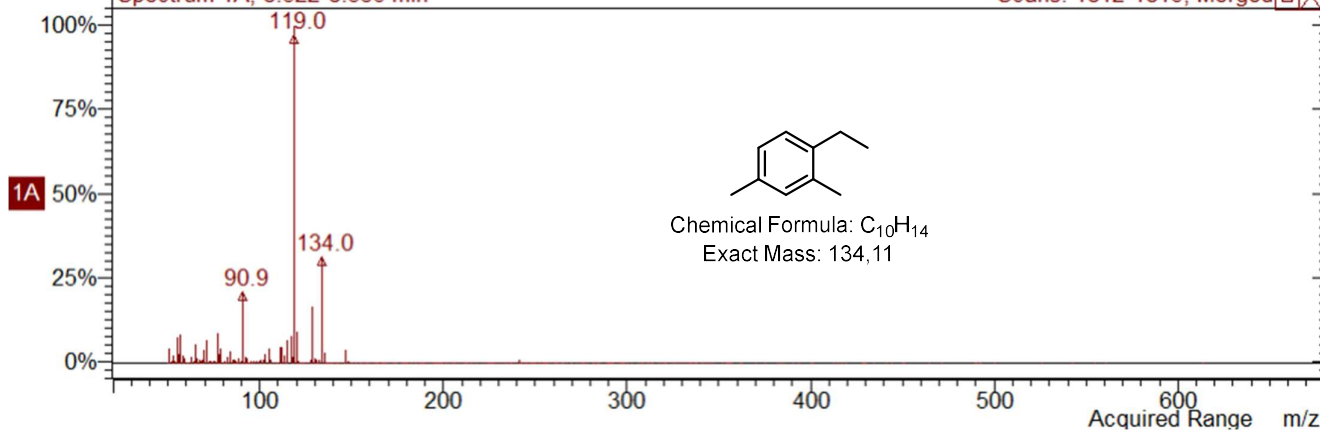

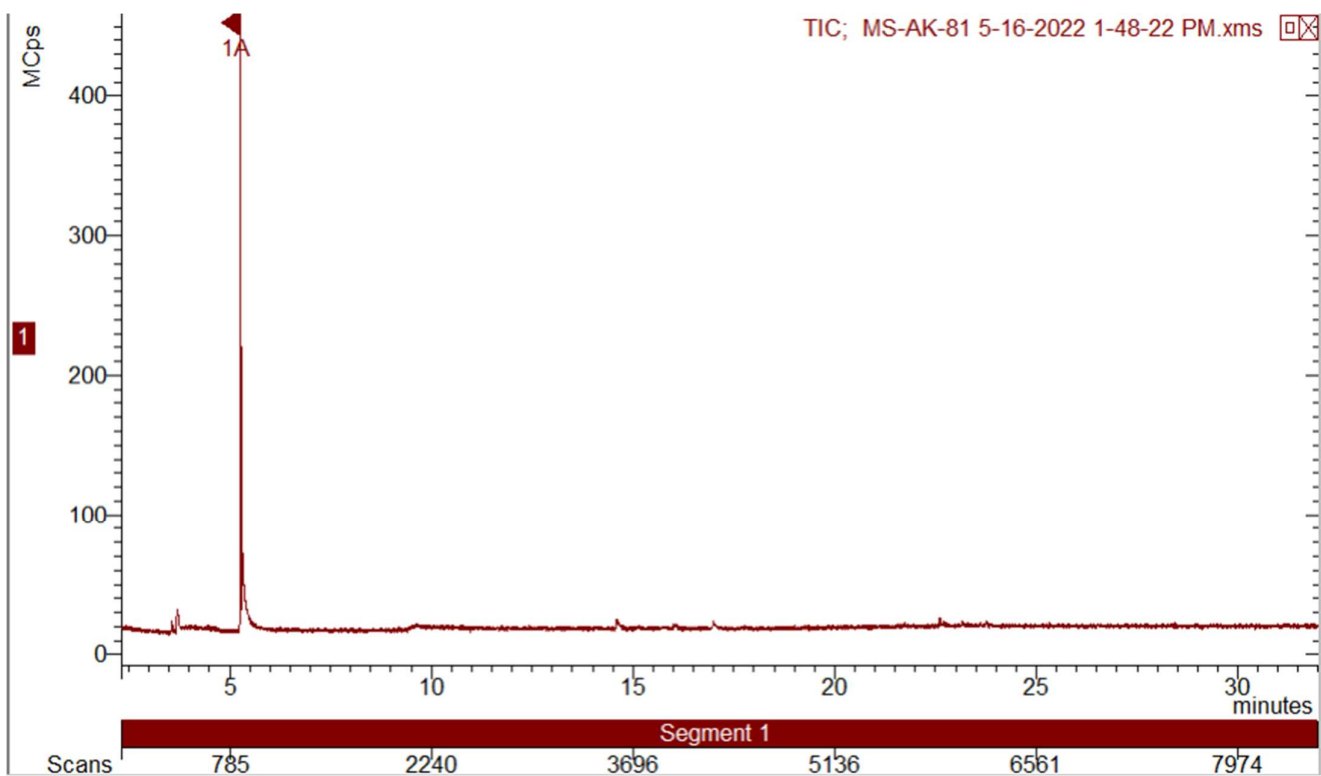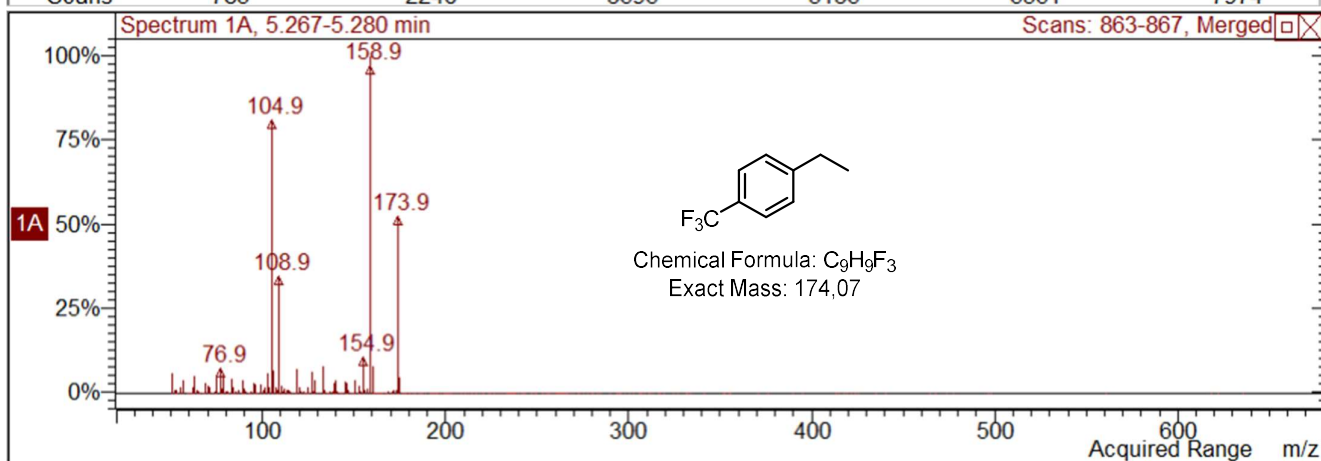

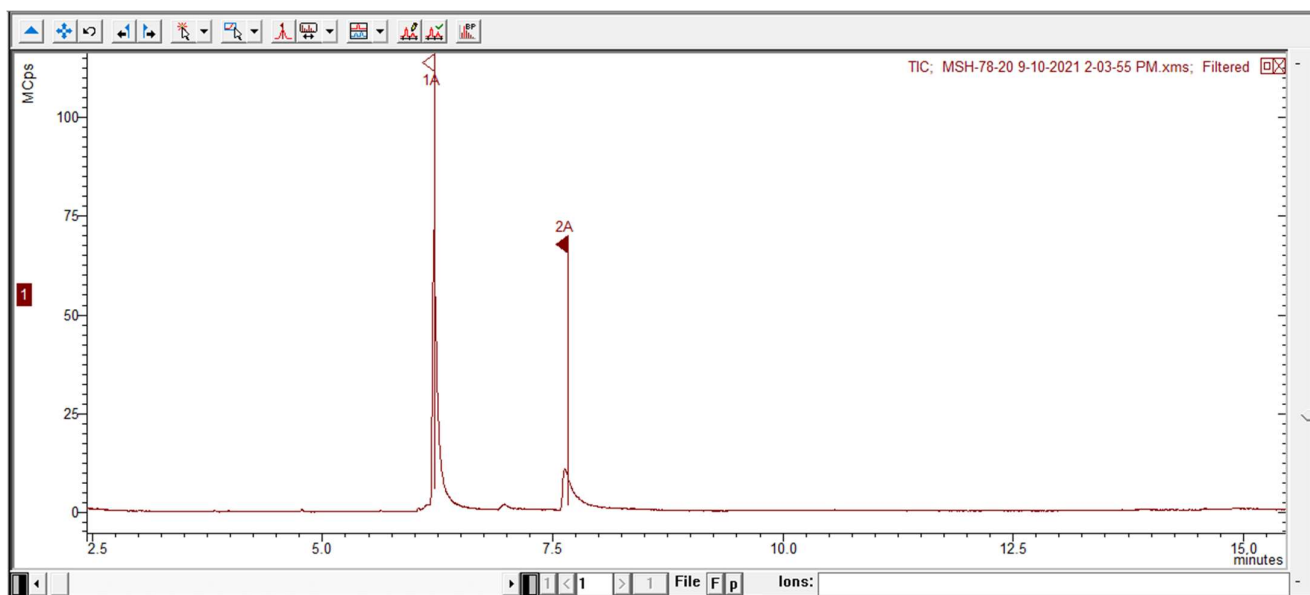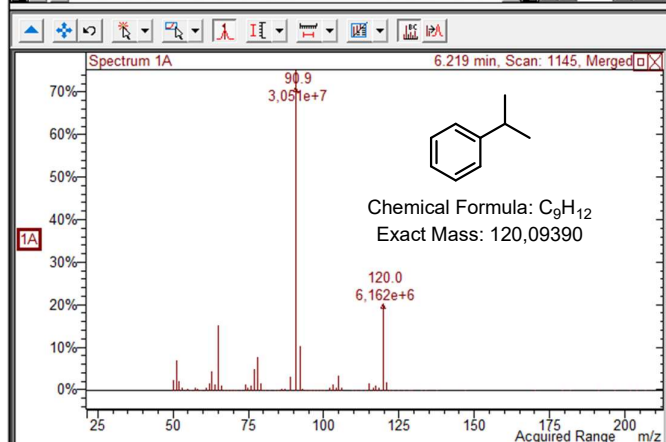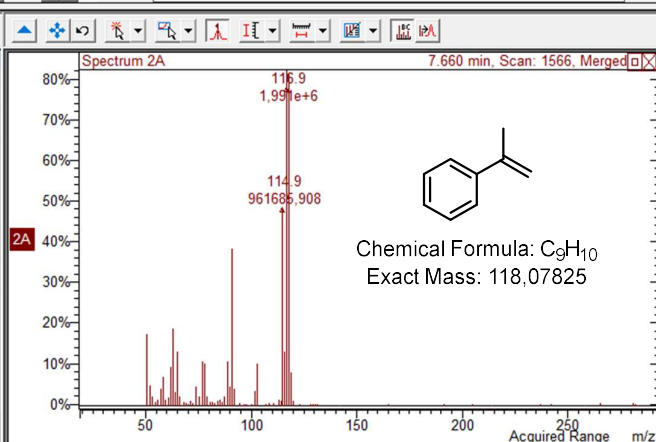

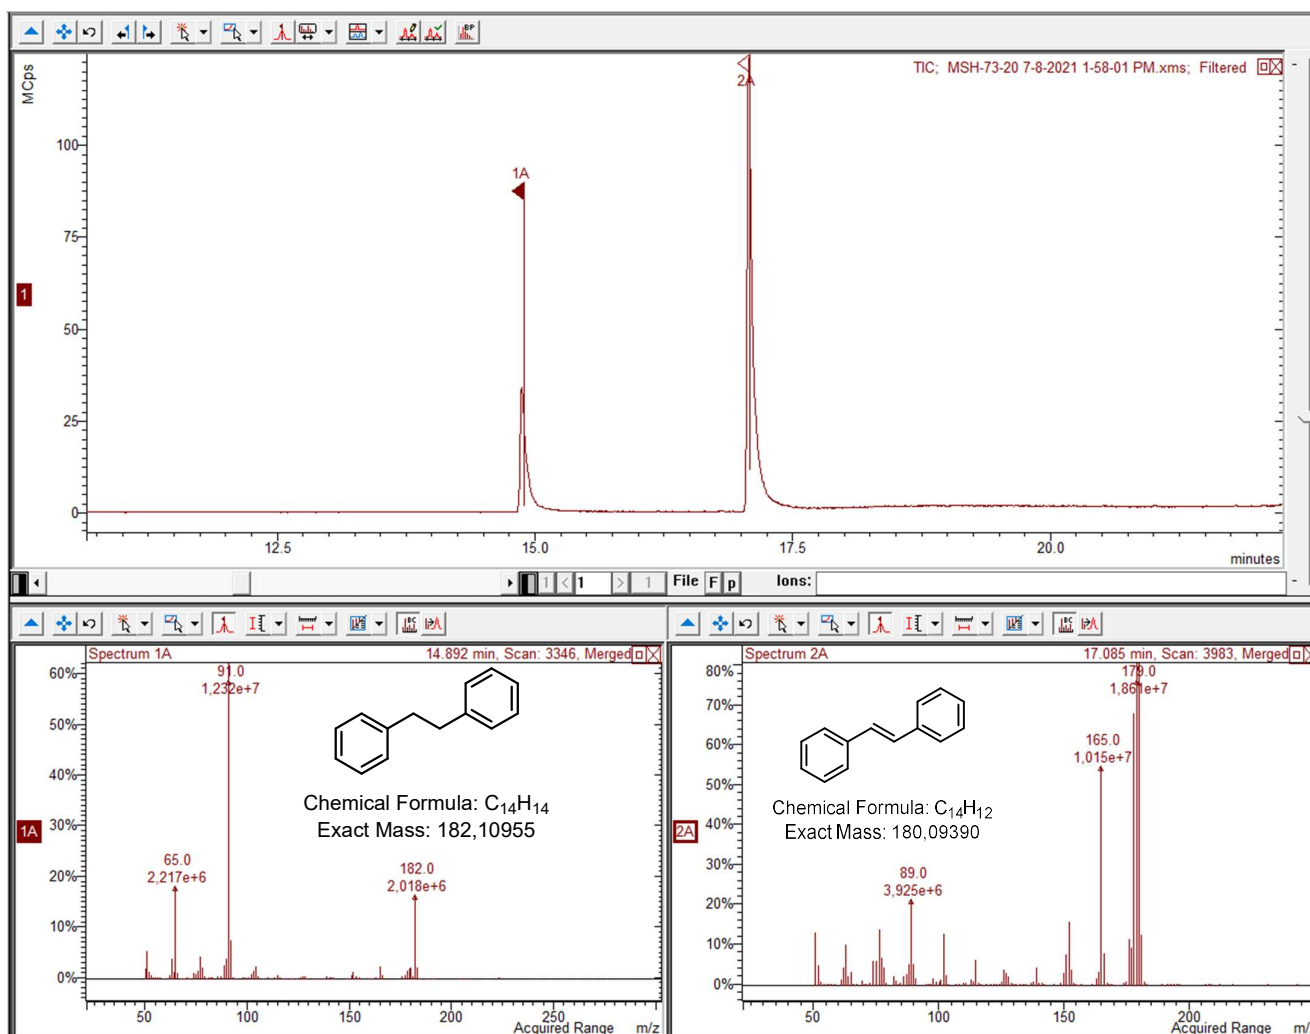

Setup and parameters of GC-MS: Bruker Scion 436-GC compiled with Bruker Scion SQ-MS. Analytical capillary column WCOT, diameter 0.25 mm, length 30 m, stationary phase Agilent DB-5. Method parameters: Injector temperature 240 °C, sample volume 1 µL, constant gas flow 1 mL/min, temperature program 60 °C (3 min); 10 °C/min; 250 °C (10 min).
